# Supplementary material
Source: PubMed Central journal article supplement (PMC3487169)
Supplement: NIHMS394798-supplement-stab_1.pdf [file NIHMS394798-supplement-stab_1.pdf]

**Table 1: Lack of the expression of the epitope recognized by scFv-FcC21 by normal tissue cells**

| <b>Organ</b>       | <b>Pathology diagnosis</b> | <b>IHC Results</b> |
|--------------------|----------------------------|--------------------|
| Salivary gland     | Normal tissue              | Negative           |
| Esophagus          | Normal tissue              | Negative           |
| Rectum             | Normal tissue              | Negative           |
| Stomach            | Normal tissue              | Negative           |
| Kidney             | Normal tissue              | Negative           |
| Skeletal muscle    | Normal tissue              | Negative           |
| Skin               | Normal tissue              | Negative           |
| Testis             | Normal tissue              | Negative           |
| Placenta           | Normal tissue              | Negative           |
| Breast             | Normal tissue              | Negative           |
| Uterine cervix     | Normal tissue              | Negative           |
| Endometrium        | Normal tissue              | Negative           |
| Spleen             | Normal tissue              | Negative           |
| Lung               | Normal tissue              | Negative           |
| Brain              | Normal tissue              | Negative           |
| Nerve              | Normal tissue              | Uninterpretable*   |
| Thyroid            | Normal tissue              | Negative           |
| Pancreas           | Normal tissue              | Negative           |
| Ovary              | Normal tissue              | Negative           |
| Prostate           | Normal tissue              | Negative           |
| <b>Cell-pellet</b> |                            | <b>IHC Results</b> |
| M14/CSPG4          | Human melanoma             | Positive           |
| M14                | Human melanoma             | Negative           |
