# Supplementary material
Source: PubMed Central journal article supplement (PMC3487169)

sFig.1

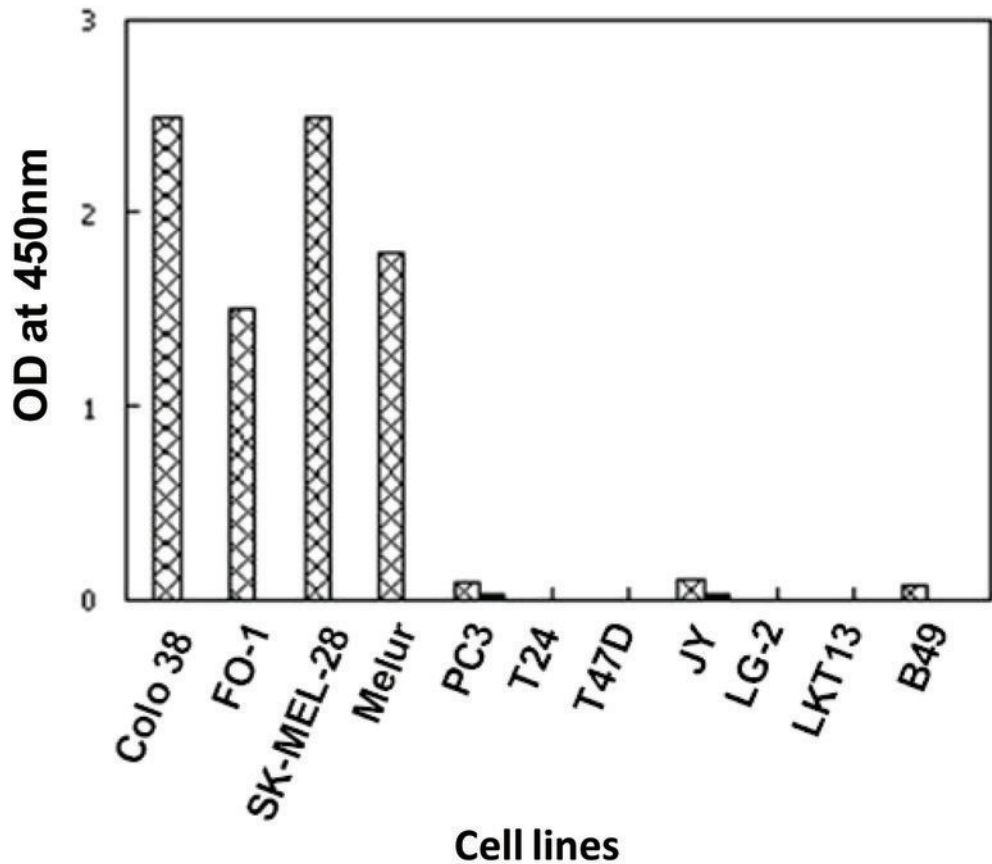

Supplement: NIHMS394798-supplement-sfig_1.pdf [file NIHMS394798-supplement-sfig_1.pdf]

**sFig.2**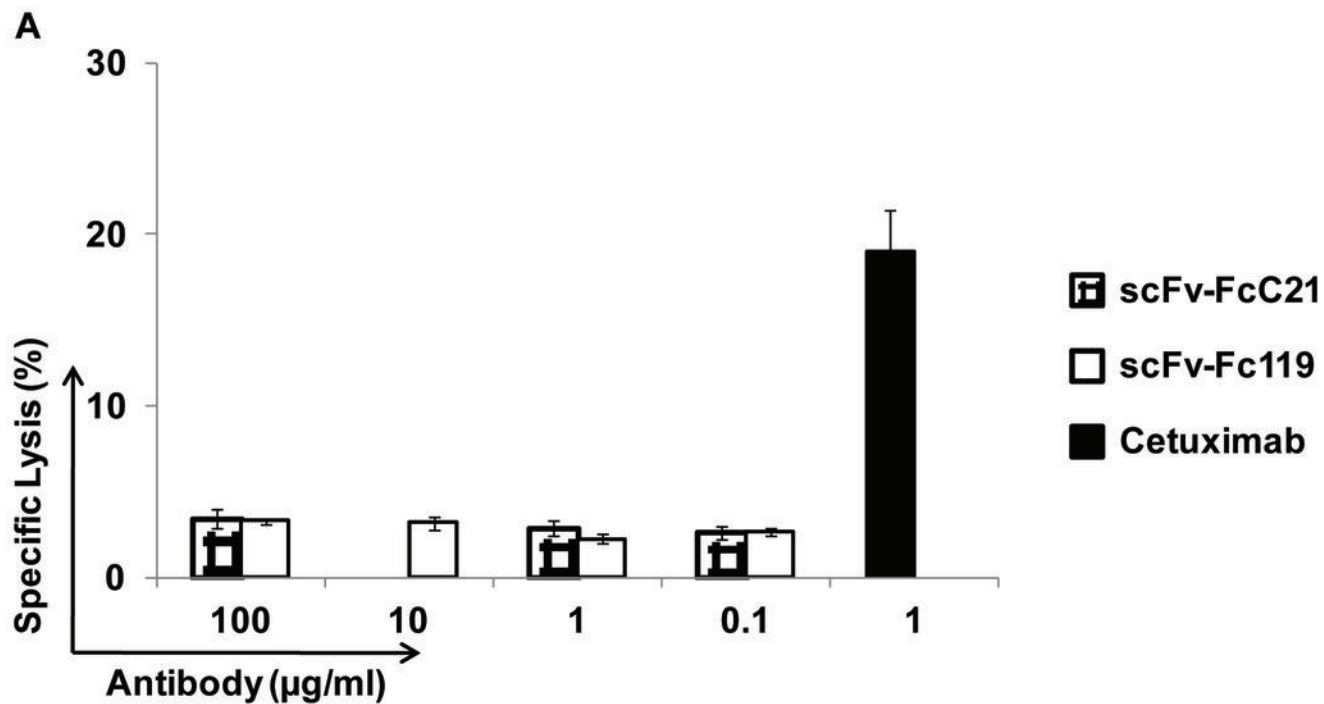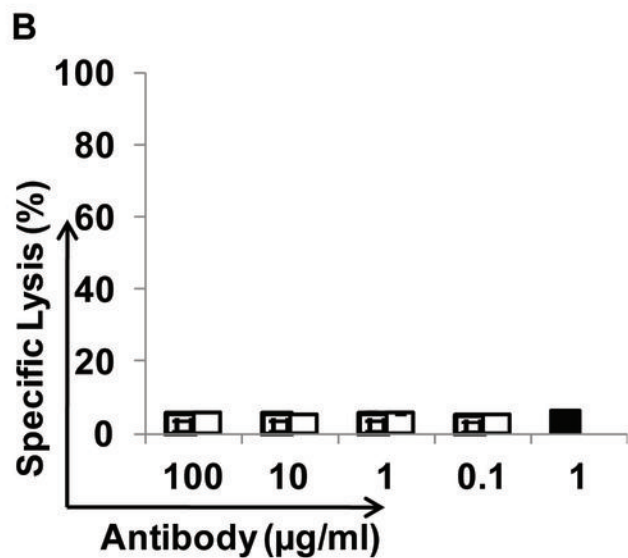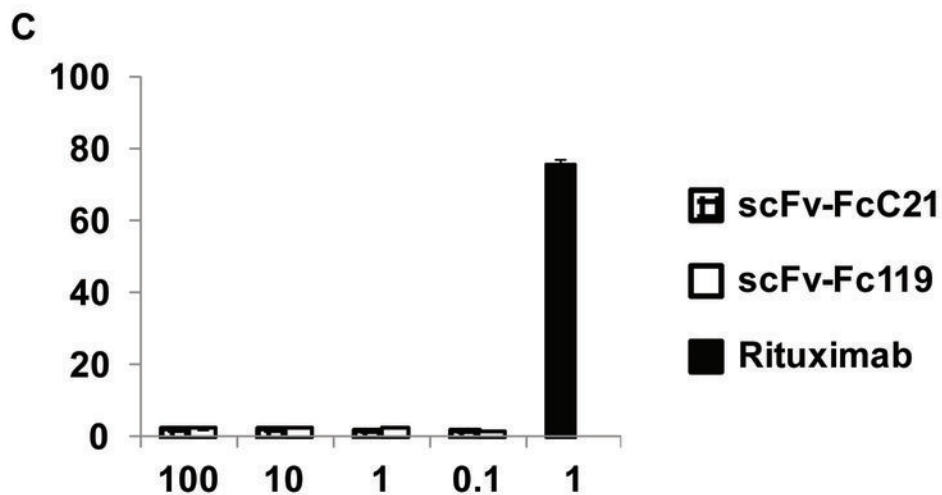

Supplement: NIHMS394798-supplement-sfig_2.pdf [file NIHMS394798-supplement-sfig_2.pdf]

sFig.3

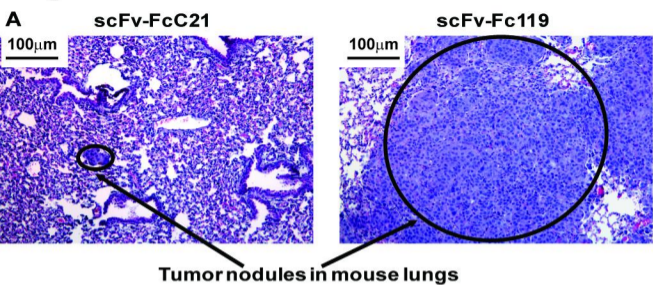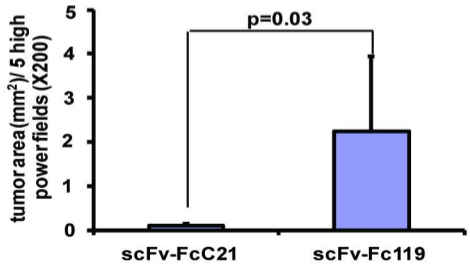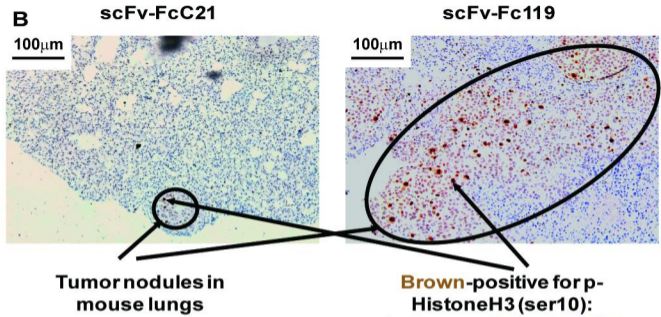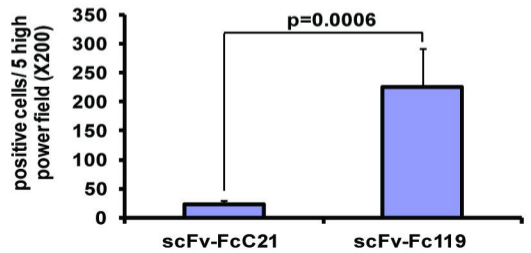

Supplement: NIHMS394798-supplement-sfig_3.pdf [file NIHMS394798-supplement-sfig_3.pdf]
